# Supplementary material for: Effects of Metformin on Transcriptomic and Metabolomic Profiles in Breast Cancer Survivors Enrolled in the Randomized Placebo-Controlled MetBreCS Trial
Source: Research Square preprint supplement (doi:10.21203/rs.3.rs-3404464/v1), 2023-10-19
Supplement: Supplementary file 2 [file 25c8834dbe98cb2d85b0c648.docx]

**
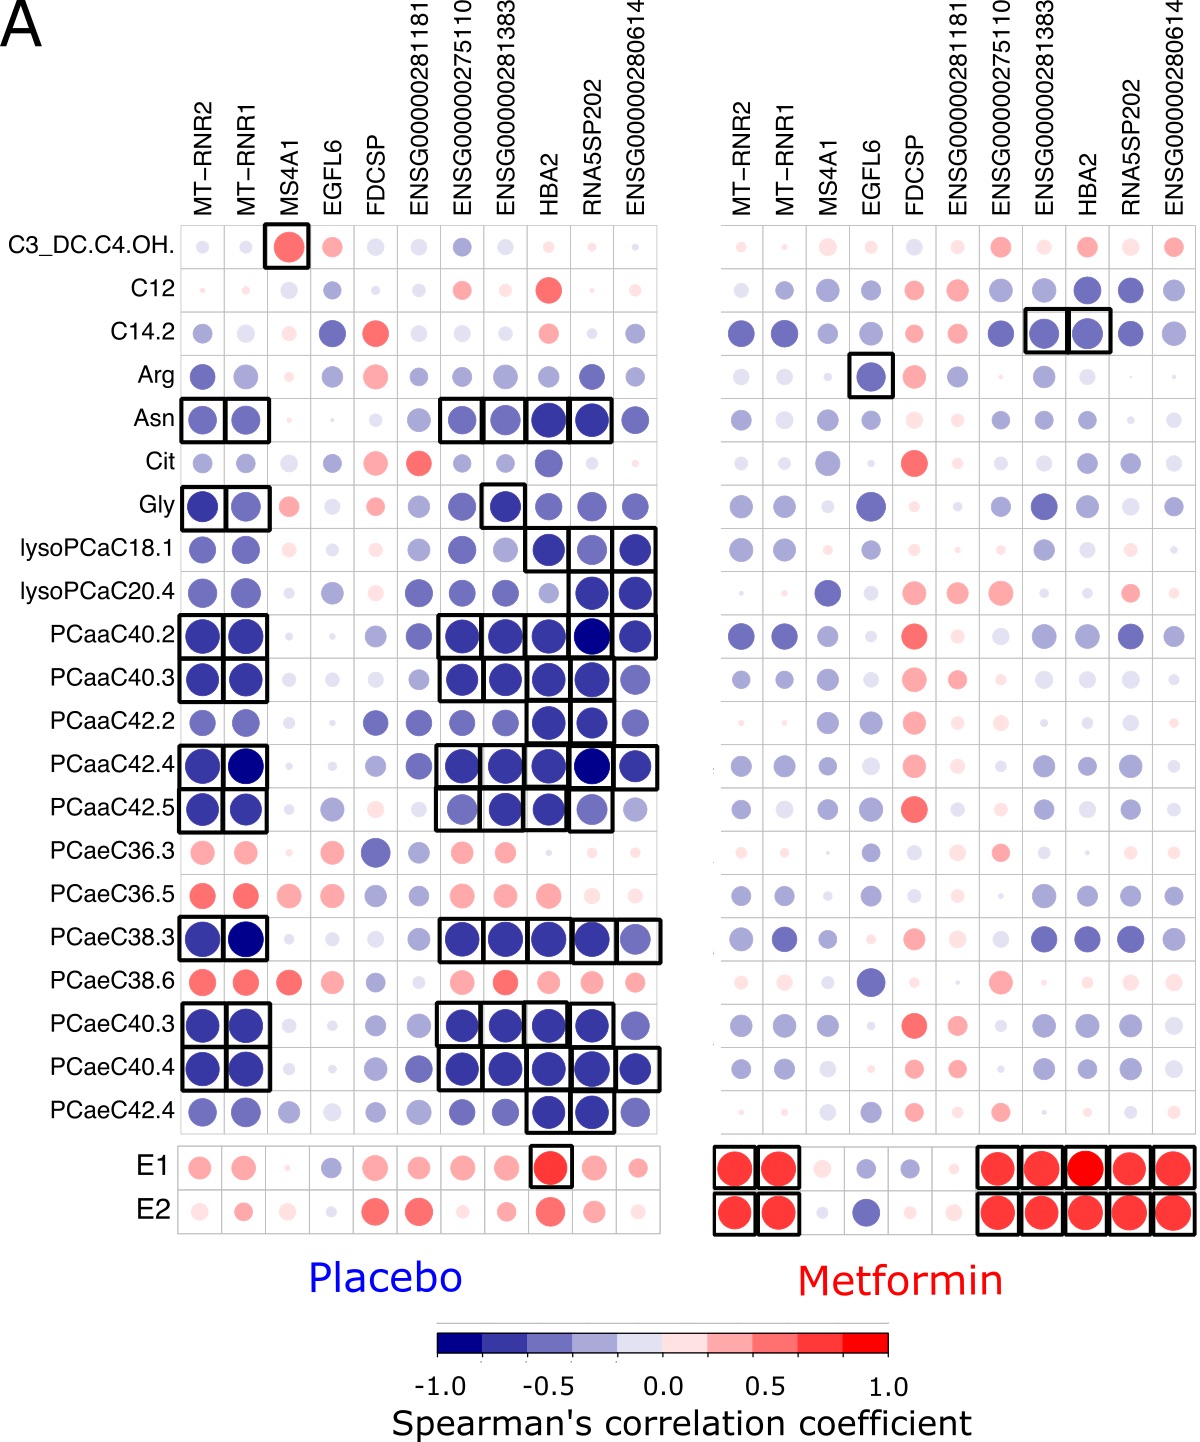
**

**Figure S3. A.** The heat map showing Spearman´s correlation between the differentially expressed breast tissue genes and the circulating levels of significantly altered metabolites (p <0.05), E1 and E2 in the postmenopausal metformin- vs. placebo-treated groups. The circle size and color represent the correlation coefficient as shown in the color bar. Significant correlated genes (p <0.05) are marked with squares.
