# Supplementary material for: Effects of Metformin on Transcriptomic and Metabolomic Profiles in Breast Cancer Survivors Enrolled in the Randomized Placebo-Controlled MetBreCS Trial
Source: Research Square preprint supplement (doi:10.21203/rs.3.rs-3404464/v1), 2023-10-19
Supplement: Supplementary file 4 [file 73fb48bdc9ddf921b4eb8d49.xlsx]

## Sheet: Table S1
Table S1. Characteristics of the participants by treatment groups in the MetBreCS trial
	Placebo	Metformin	p-value*
	(N=13, one lost follow-up)	(N=27)
Weight Loss intervention n (%)
No	7 (58.3%)	13 (48.2%)	1
Yes	5 (41.7%)	11 (40.7%)
Missing	0 (0%)	3 (11.1%)
Age, median [Q1, Q3]	62 [48.3, 64.3]	52 [47.3, 55.0]	0.159
Baseline BMI, median [Q1, Q3]	28.1 [26.8, 29.3]	29.5 [26.7, 31.4]	0.019
Menopausal status, n (%)
Post-menopausal	12 (100%)	16 (59.3%)	0.025
Pre-menopausal	0 (0%)	11 (40.7%)
Tumor molecular subtype, n (%)
Triple negative	7 (58.3%)	10 (37.0%)	0.154
Non-luminal HER2+	4 (33.3%)	11 (40.7%)
Luminal HER2+	0 (0%)	5 (18.5%)
Missing	1 (8.3%)	2 (7.4%)
Estrogen Receptor Status, n (%)
Negative	12 (100%)	21 (77.8%)	0.233
Positive	0 (0%)	6 (22.2%)
Missing	0 (0%)	0 (0%)
*p-values derived from Wilcoxon rank-sum test for numerical variables and from Chi-square test for categorical variables.
The differences between the treatment groups (Metformin vs. Placebo) were tested with Wilcoxon rank-sum or Chi-square tests for the numerical and categorical of the clinical features.

## Sheet: Table S2
Table S2. Identified plasma metabolites with metformin treatment-associated changes in time that differ significantly (based on p-value <0.05) from placebo.
Metabolites/Features	Metabolite class/Annotated feature	β-regression coefficient *	p-value **	Adjusted p-value ***
Targeted approach
C4-OH (C3-DC)	Hydroxybutyrylcarnitine (Malonylcarnitine)	0.011576915	0.021896855	0.3299171
C12	Dodecanoylcarnitine	-0.021928392	0.037005108	0.3299171
C14:2	Tetradecadienylcarnitine	-0.007242715	0.048915545	0.3299171
Arg	Amino acid	-9.446760269	0.031834870	0.3299171
Asn	Amino acid	4.778663116	0.010102957	0.3299171
Cit	Amino acid	-7.240585871	0.040496295	0.3299171
Gly	Amino acid	35.284009318	0.049746413	0.3299171
lysoPCaC18:1	Glycerophospholipids	3.330522970	0.046092503	0.3299171
lysoPCaC20:4	Glycerophospholipids	0.714287546	0.020422668	0.3299171
PCaaC40:2	Glycerophospholipids	-0.072598989	0.036888812	0.3299171
PCaaC40:3	Glycerophospholipids	-0.079132447	0.012557287	0.3299171
PCaaC42:2	Glycerophospholipids	-0.032257146	0.041297114	0.3299171
PCaaC42:4	Glycerophospholipids	-0.028972419	0.048424355	0.3299171
PCaaC42:5	Glycerophospholipids	-0.038690438	0.006710591	0.3299171
PCaeC36:3	Glycerophospholipids	-1.226782564	0.035317401	0.3299171
PCaeC36:5	Glycerophospholipids	-1.942990312	0.031470521	0.3299171
PCaeC38:3	Glycerophospholipids	-1.403531020	0.015210258	0.3299171
PCaeC38:6	Glycerophospholipids	-1.039281924	0.043226900	0.3299171
PCaeC40:3	Glycerophospholipids	-0.601479041	0.020084575	0.3299171
PCaeC40:4	Glycerophospholipids	-0.386423244	0.044911012	0.3299171
PCaeC42:4	Glycerophospholipids	-0.109228550	0.030839770	0.3299171
Untargeted approach ****
246.1375@2.6396875	not annotated	134226.365	0.005159492	0.5498777
152.0577@1.6871359	not annotated	28979.189	0.036108622	0.8460364
519.3327@6.9529095	LysoPC(18:2)	-95638.262	0.005737753	0.5498777
541.3152@6.9534364	LysoPC(20:5)	-57464.578	0.040366513	0.8460364
186.0498@0.73312473	not annotated	55233.060	0.022068736	0.8460364
216.0625@3.214955	Caffeine	35499.548	0.037427497	0.8460364
279.1429@6.952684	LysoPC(18:2)	-25291.183	0.006449565	0.5498777
543.3312@7.1253047	LysoPC(20:4)	-25681.383	0.017016925	0.7476811
271.1536@6.9532104	LysoPC(20:5)	-43318.851	0.010662065	0.6489129
136.0624@0.61867136	1-methylnicotinamide	6579.261	0.007039687	0.5498777
177.9578@0.872926	not annotated	-27679.691	0.015190036	0.7476811
287.1291@6.953939	LysoPC(18:2)	-17923.941	0.019021754	0.7866055
178.9831@1.0052351	not annotated	-10585.020	0.026167156	0.8460364
69.057@0.7127944	not annotated	-10471.414	0.026638430	0.8460364
285.2226@7.241724	not annotated	-6678.057	0.023222568	0.8460364
247.0282@3.1562908	4-methyl-2-oxovalerate	-7510.986	0.047758821	0.8835382
204.9804@0.815727	not annotated	-8385.396	0.042110599	0.8460364
543.3319@7.1253843	LysoPC(20:4)	-23031.422	0.035859782	0.8460364
473.2773@5.868209	not annotated	9590.035	0.042121302	0.8460364
247.1421@0.9074893	not annotated	-2832.645	0.006441762	0.5498777
220.0237@1.744032	not annotated	-11515.568	0.001452883	0.4825244
543.3316@7.1253843	LysoPC(20:4)	-22669.818	0.034302468	0.8460364
343.2733@5.7722397	not annotated	4694.556	0.030974604	0.8460364
128.0479@0.7241638	not annotated	5138.513	0.041866032	0.8460364
187.1197@0.7376418	not annotated	2214.131	0.043362019	0.8467639
268.2196@7.238816	Retinol	-2740.858	0.034105496	0.8460364
291.1413@6.942807	not annotated	-4390.615	0.030889897	0.8460364
152.0586@1.6871792	not annotated	35025.480	0.016298223	0.7476811
224.103@5.027979	not annotated	2045.673	0.046831696	0.8835382
566.3189@6.9446955	not annotated	-2852.299	0.026092621	0.8460364
57.0571@0.7027857	not annotated	-2387.405	0.011076749	0.6489129
350.1191@0.73251426	not annotated	4173.648	0.002059137	0.4825244
114.0422@0.88638544	5,6-Dihydrouracil ?	2775.583	0.005430376	0.5498777
366.113@0.727018	Unknown	3287.988	0.001926735	0.4825244
287.9146@0.5565221	not annotated	2288.350	0.016800363	0.7476811
181.0952@0.7358742	not annotated	3189.467	0.010815593	0.6489129
75.0322@0.8909828	Glycine	-2428.762	0.031492919	0.8460364
139.061@0.8538033	Valine	-8544.883	0.039805721	0.8460364
* Positive beta coefficient indicates a bigger increase in time of the metabolite ￼￼in the metformin arm compared to placebo arm, whereas negative coefficient indicates a bigger decrease of the metabolite in the metformin arm.
** p-value of the Treatment covariate (Metformin vs Placebo) derived from a multivariable linear regression model fit on the metabolite changes (post-treatment - baseline) adjusted for the basal value of each metabolite, basal BMI and menopause status
*** FDR-corrected p-value
**** The features are described as the obtained Mass@retention time (min) format.
The metformin-associated significant changes of the metabolites found in the pooled RFH + MetBreCS study are in bold.
